# Supplementary material
Source: PubMed Central journal article supplement (PMC2670656)

**Fig S1**

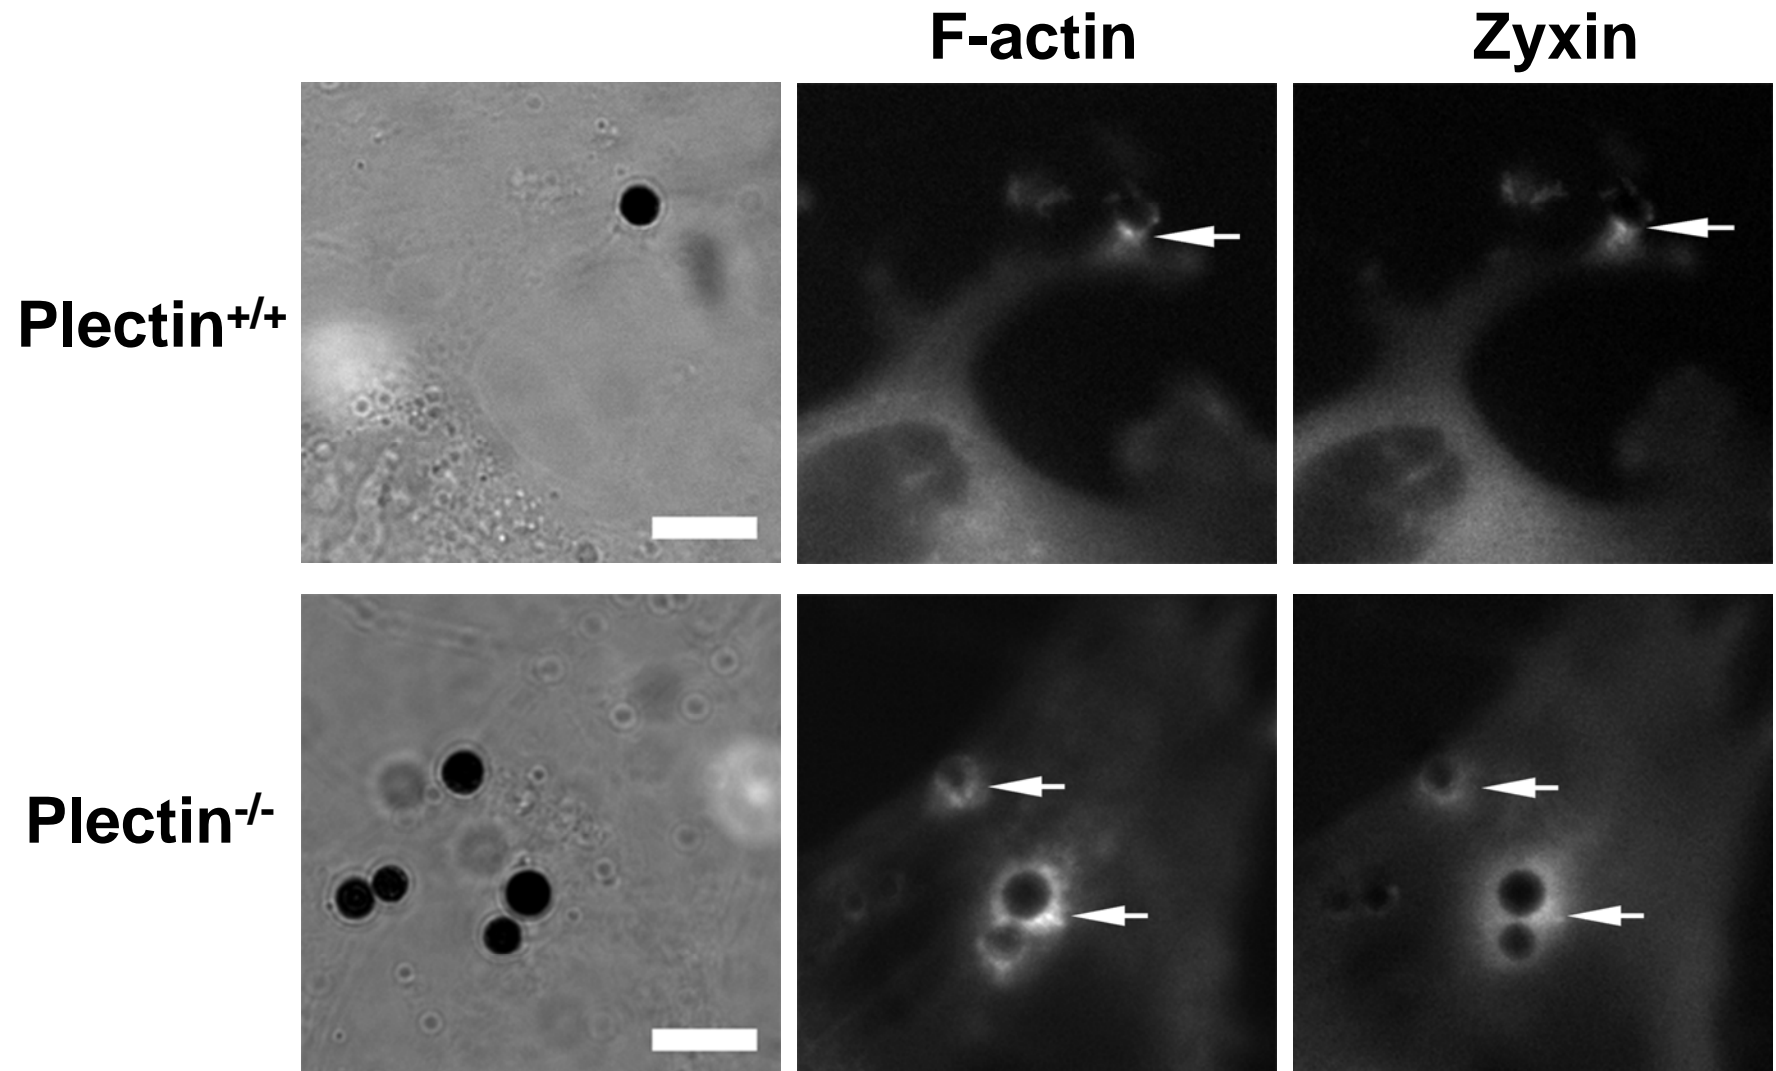

**Fig S2**

**Plectin<sup>+/+</sup>**

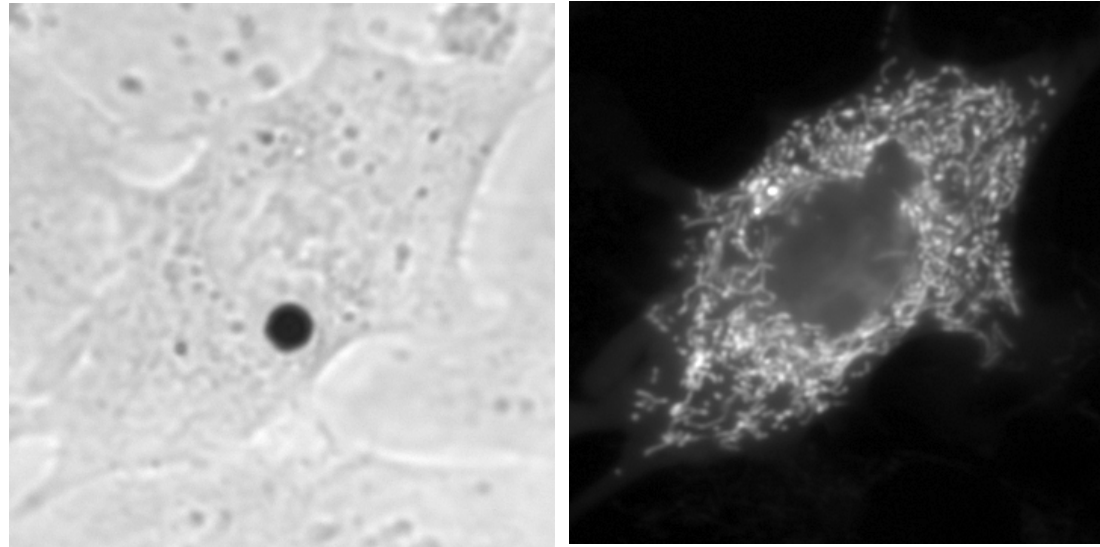

**Plectin<sup>-/-</sup>**

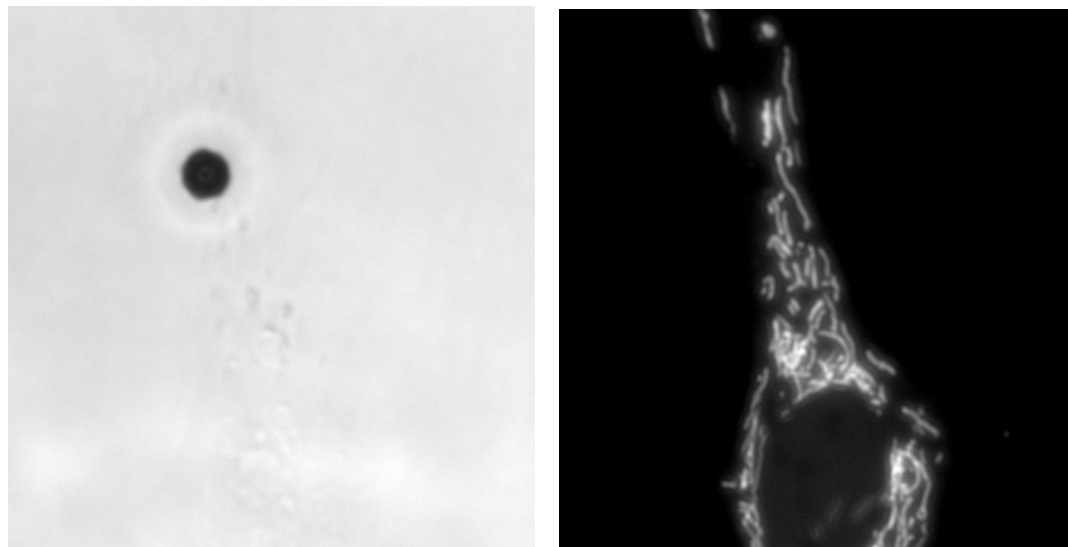

**Fig S3**

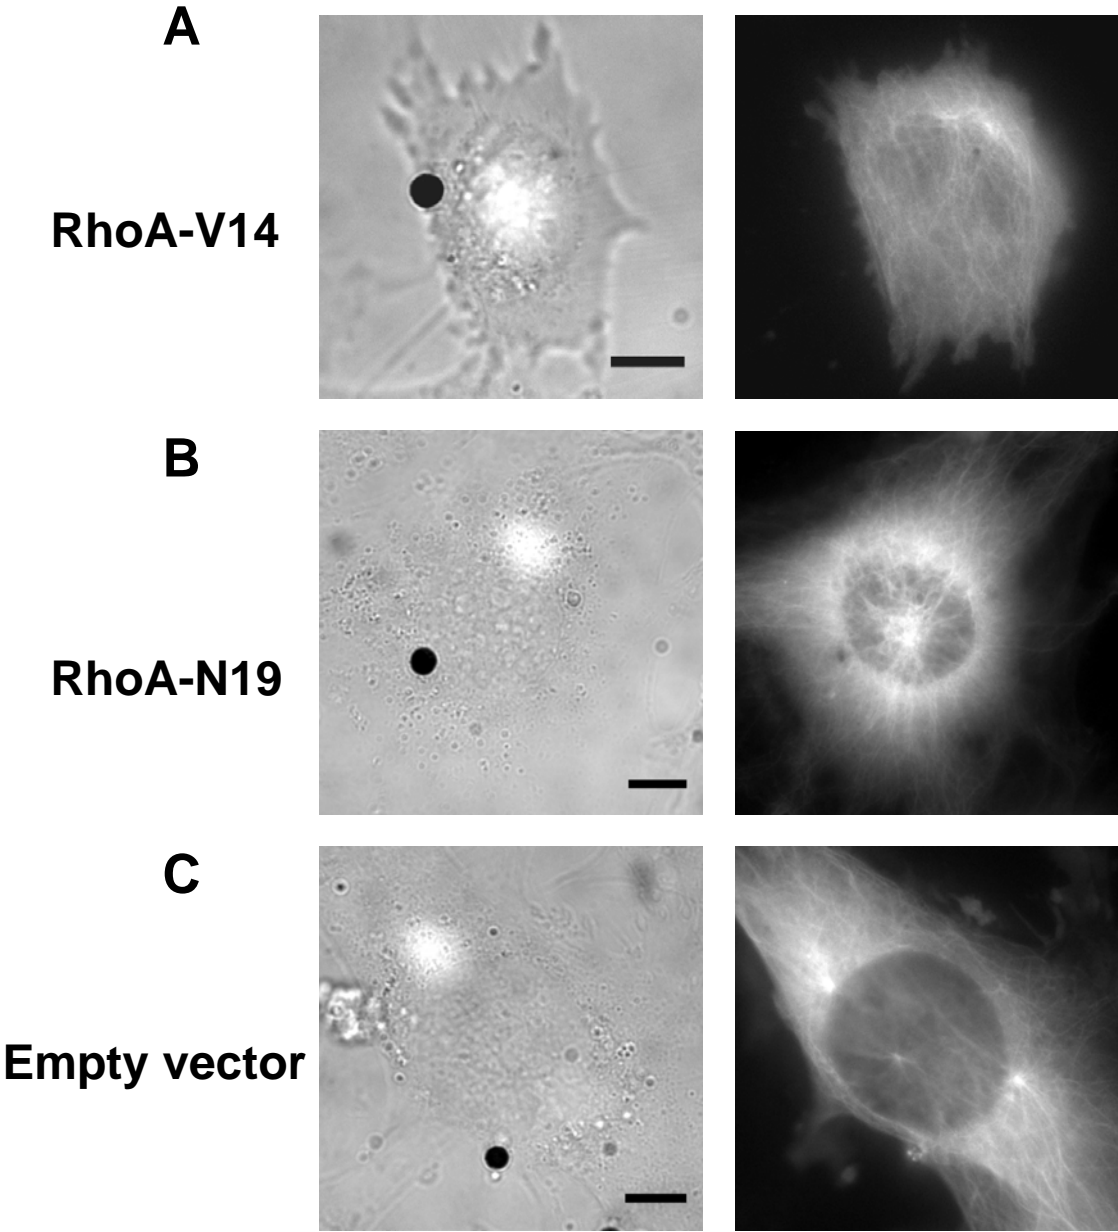

Supplement: 00604.2008_1.pdf [file 00604.2008_1.pdf]
